# Supplementary material
Source: PubMed Central journal article supplement (PMC1317643)
Supplement: molcellb_26_1_63__1.pdf [file molcellb_26_1_63__1.pdf]

Supplemental Figures

MCB 2301-04

Nutrients Suppress PI3-Kinase/Akt Signaling via Raptor-Dependent mTOR-Mediated IRS-1 Phosphorylation

A. Tzatsos and K.V. Kandror

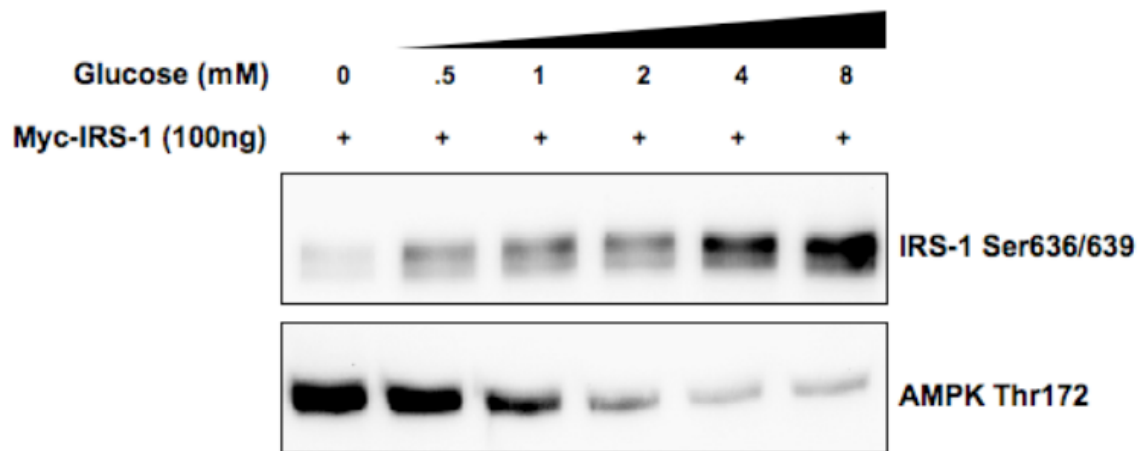

**Figure S1. Glucose stimulates phosphorylation of IRS-1 on Ser636/639 in an insulin-independent manner.** 293HEK cells were transfected with Myc-IRS-1 and starved for six hours in glucose-free KRP followed by stimulation with increasing concentration of glucose for another 10 min as indicated in the figure. Total cell lysates were analyzed by Western blotting.

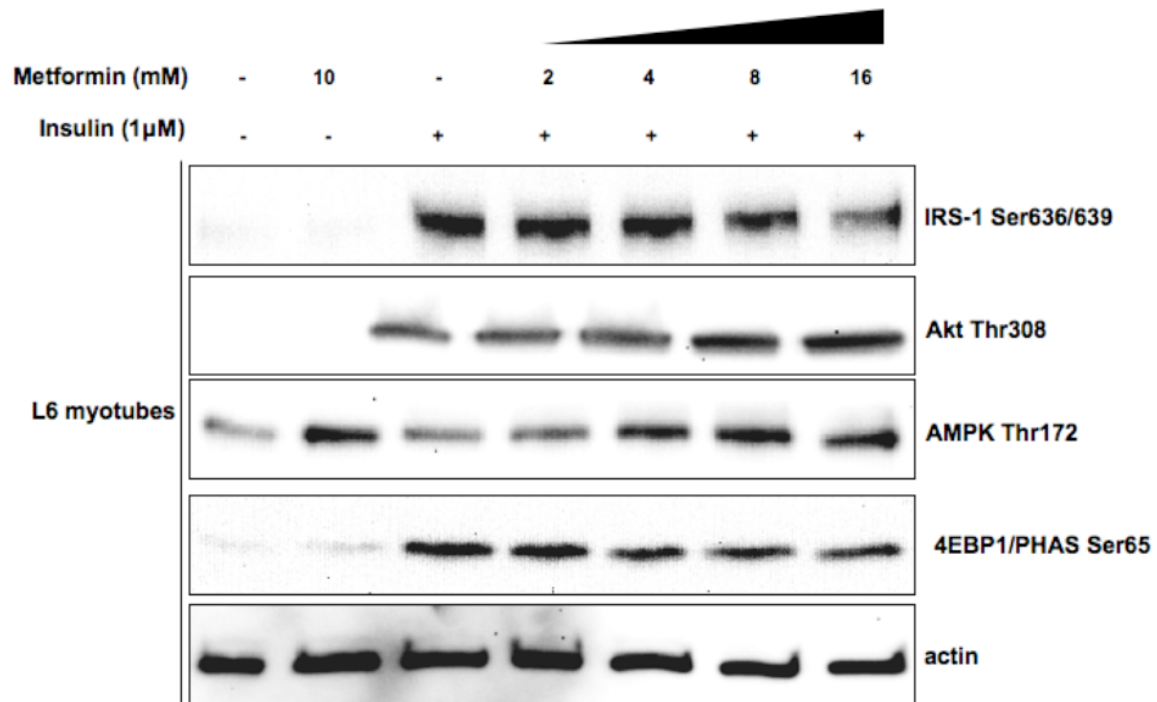

**Figure S2. Metformin suppresses mTOR signaling and enhances Akt phosphorylation in L6 myotubes.** Cells were serum starved for six hours, pre-treated for 60 minutes with indicated doses of metformin and stimulated with insulin for another 30 min. Total cell lysates were analyzed by Western blotting.

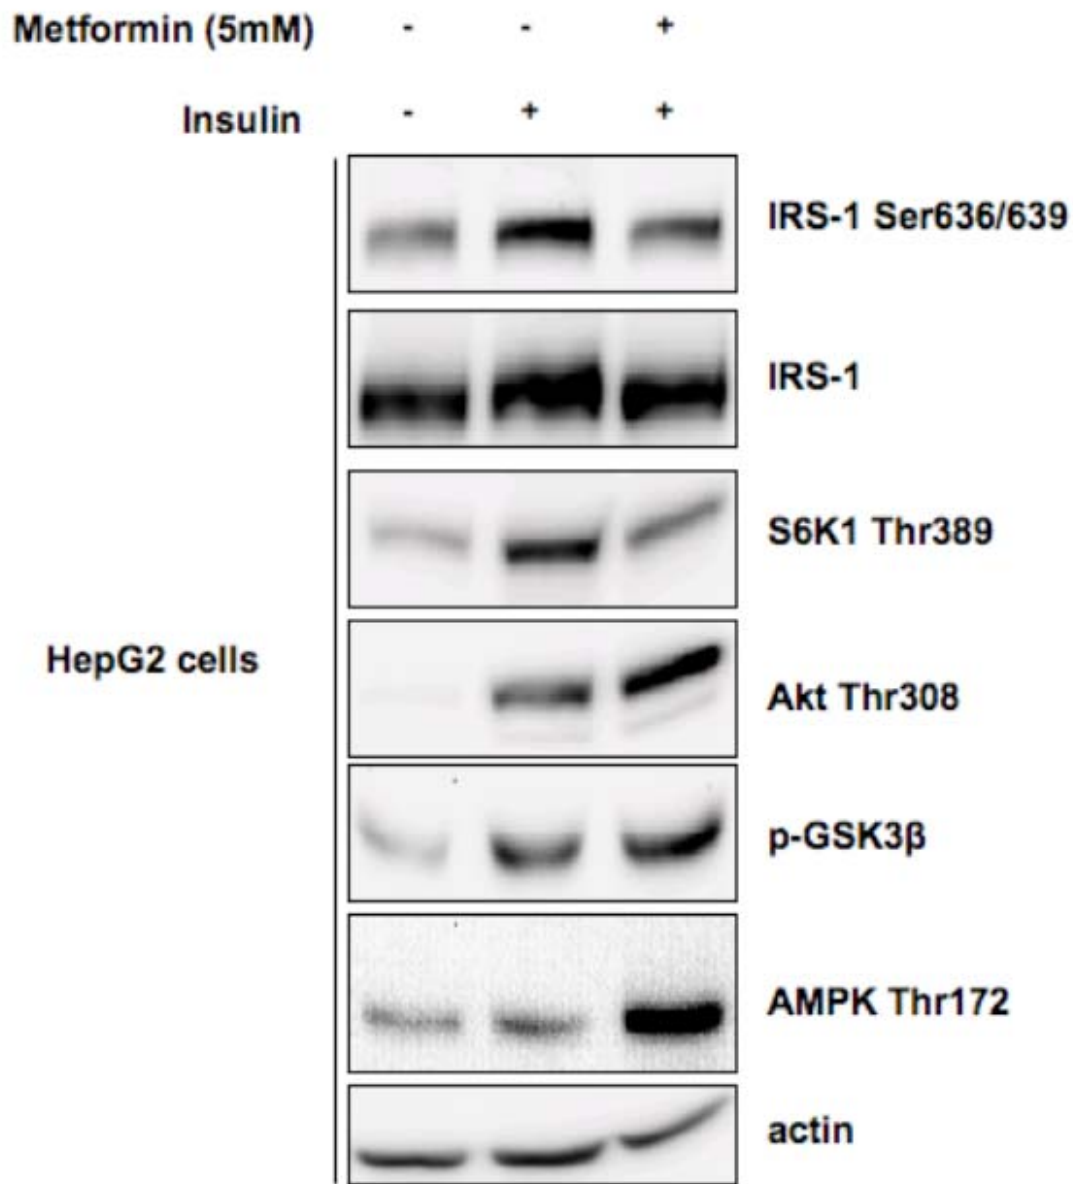

**Figure S3. Metformin enhances Akt signaling.** HepG2 cells were serum-starved for six hours, pre-treated for 60 minutes with metformin and stimulated with insulin for another 30 min. Total cell lysates were analyzed by Western blotting.

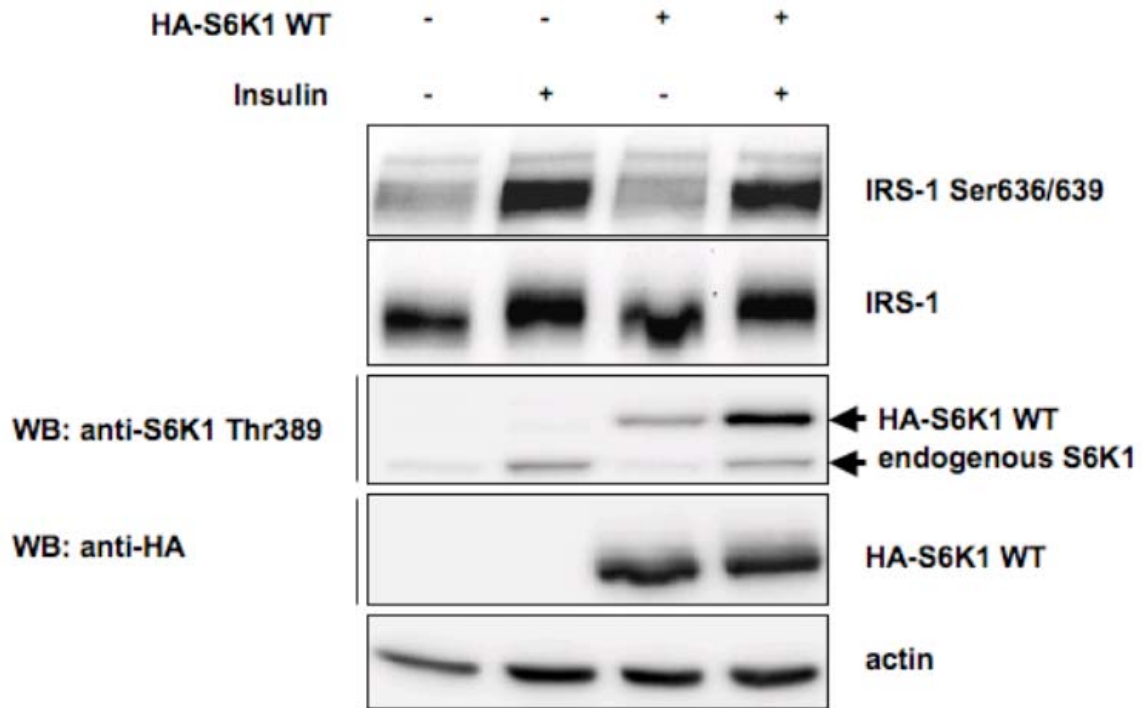

**Figure S4. Over-expression of wild type S6K1 does not interfere with basal or insulin stimulated phosphorylation of IRS-1 on Ser636/639.** NIH3T3 fibroblasts were transfected as indicated, serum-starved for six hours and stimulated with insulin for 30 min. Total cell lysates were analyzed by Western blotting.

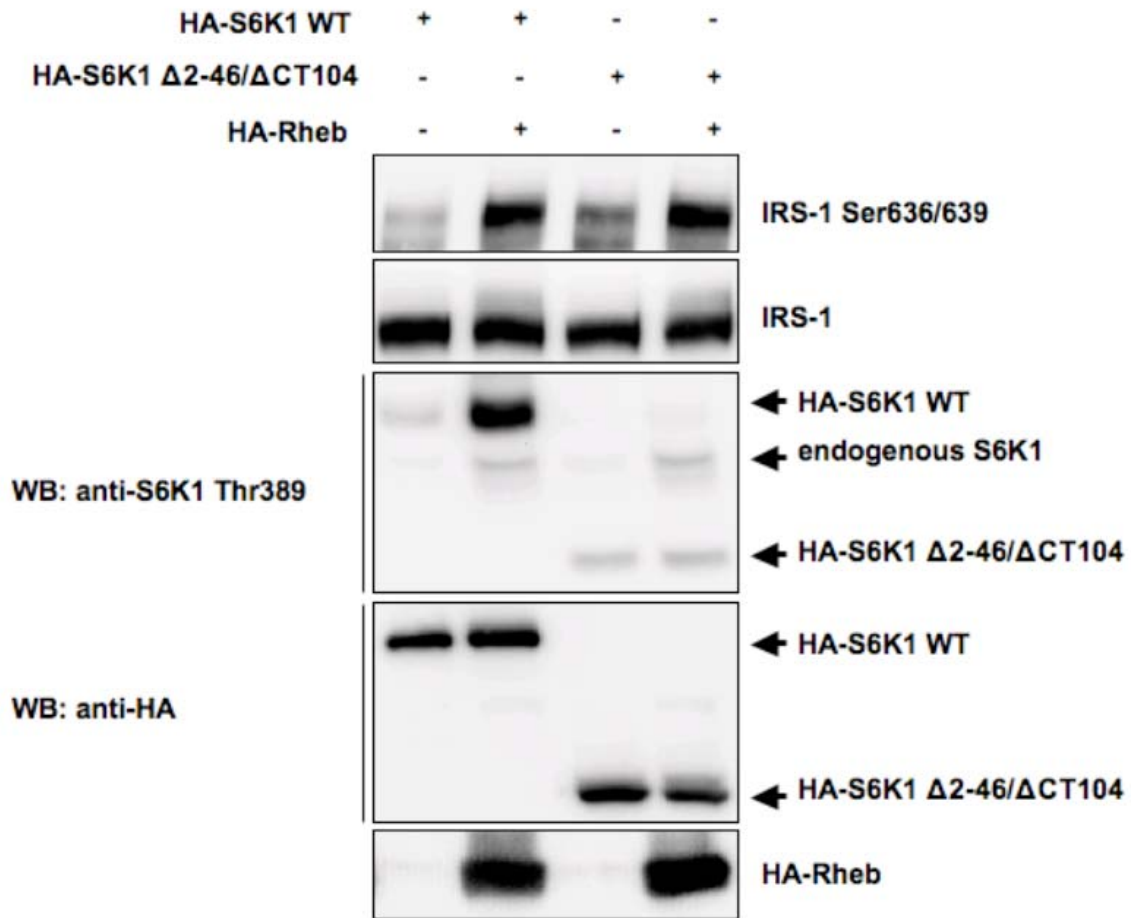

**Figure S5. Over-expression of S6K1  $\Delta$ 2-46/ $\Delta$ CT104 mutant does not interfere with the ability of Rheb to stimulate phosphorylation of IRS-1 on Ser636/639.** 293HEK cells were transfected as indicated in the figure and serum-starved for six hours. Total cell lysates were analyzed by Western blotting.
